# Supplementary figures and images for: Population pharmacokinetics of clofarabine for allogeneic hematopoietic cell transplantation in paediatric patients
Source: PubMed Central journal article supplement — Br J Clin Pharmacol. 2021 Feb 1;87(8):3218–26. doi: 10.1111/bcp.14738 (PMC8359279; doi:10.1111/bcp.14738), 2021-02-01

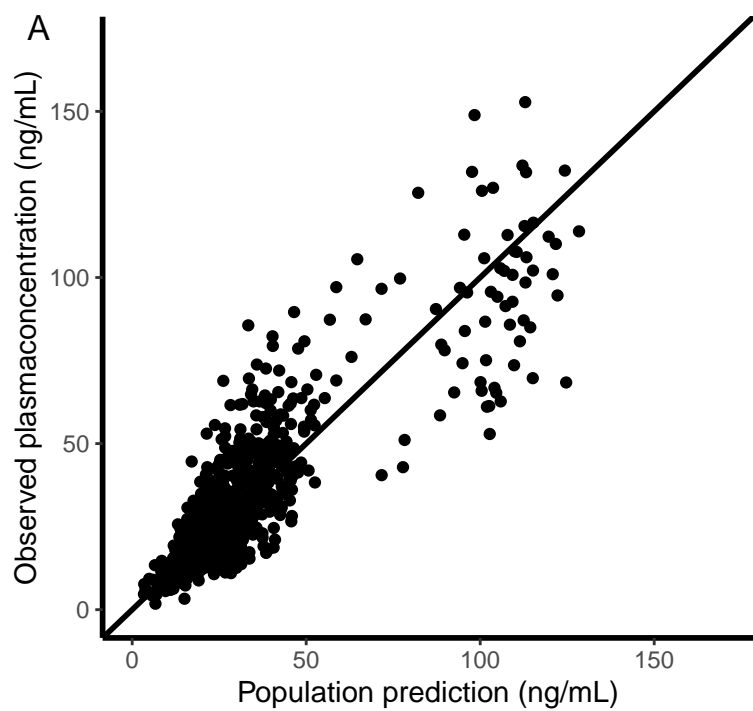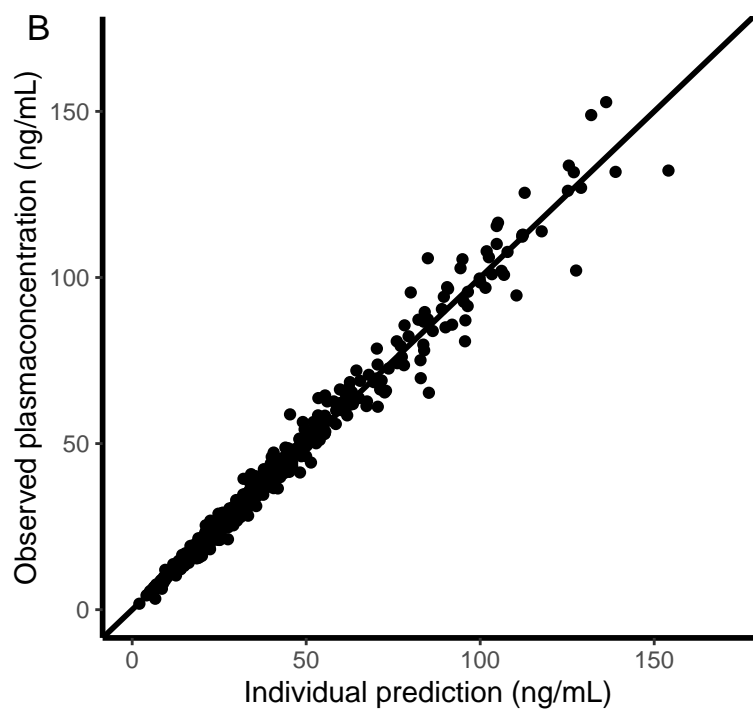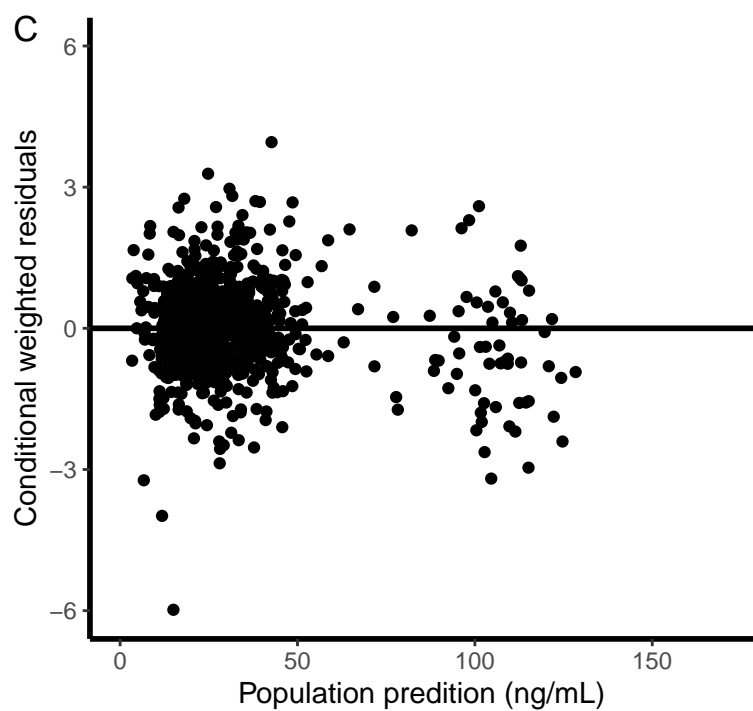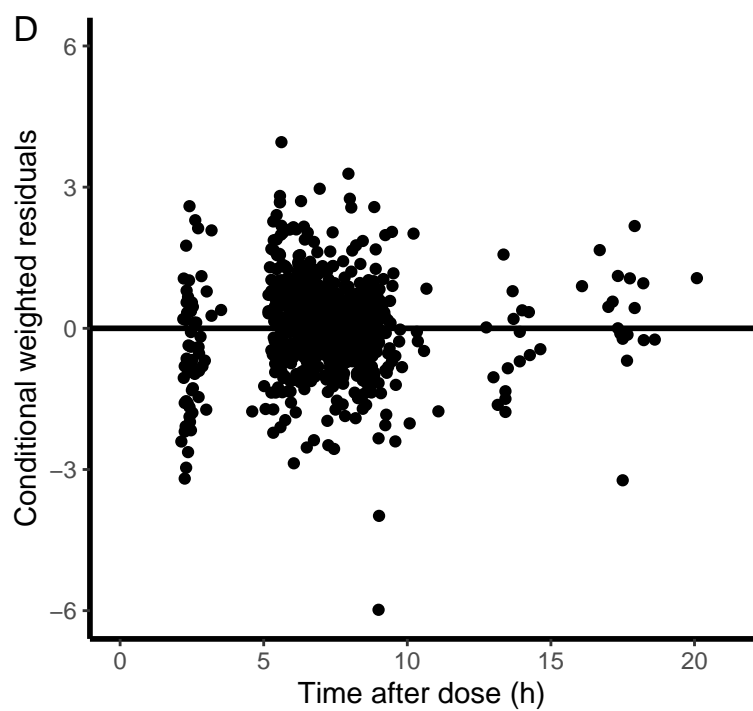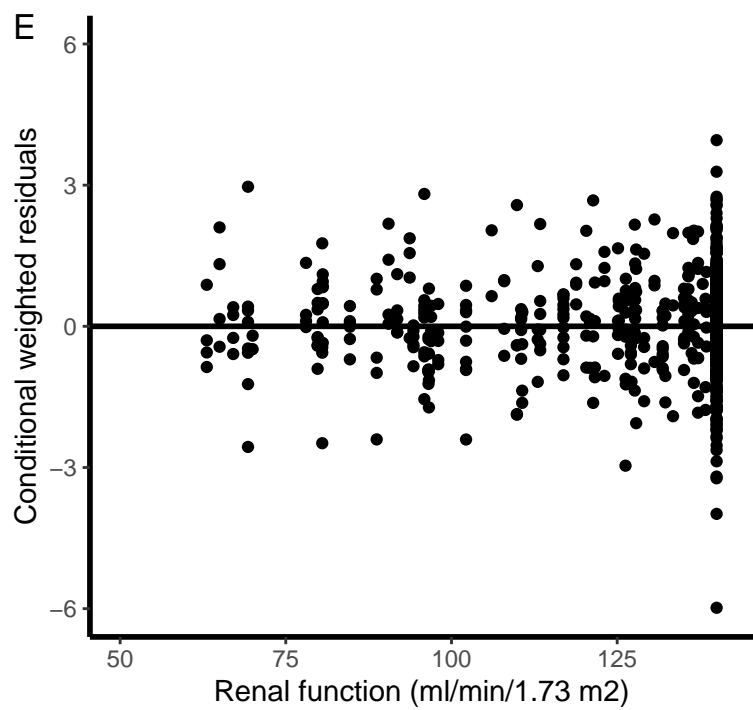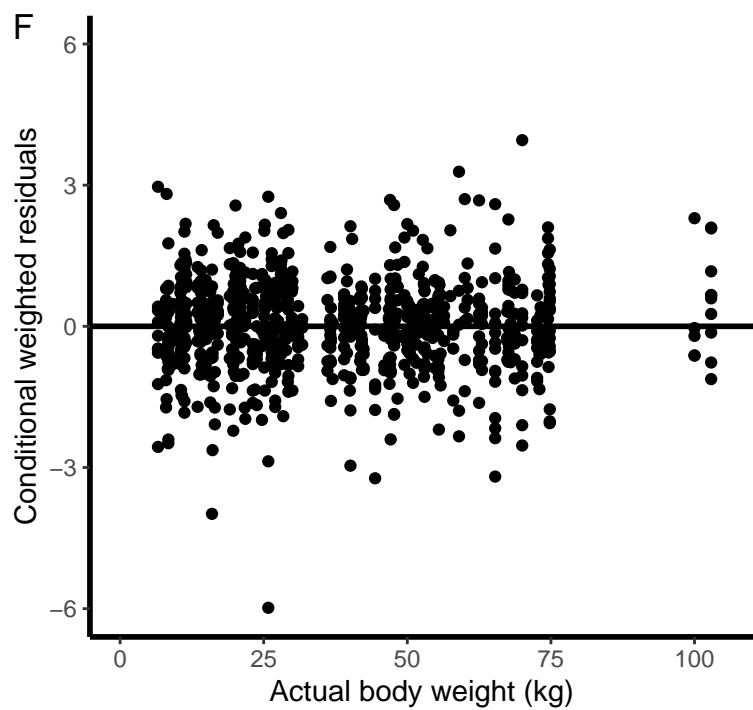

Supplement: BCP-87-3218-s001.pdf [file BCP-87-3218-s001.pdf]
